# Supplementary material
Source: publisher figshare collection journal article supplement (https://acs.figshare.com/ndownloader/files/8654641)

## Supporting Information

Authors: Tao-Xiang Yang, Li-Qing Zhao, Juan Wang, Guo-Li Song, Hai-Min Liu, Hui Cheng, Zhen Yang.

Manuscript Title: Improving whole-cell biocatalysis by addition of deep eutectic solvents and natural deep eutectic solvents

Number of pages: 4

Number of figures: 5

Number of tables: 0

## Supporting Information

Figure S1. Variation of the yield upon addition of a DES, ChAc/U (1:1)

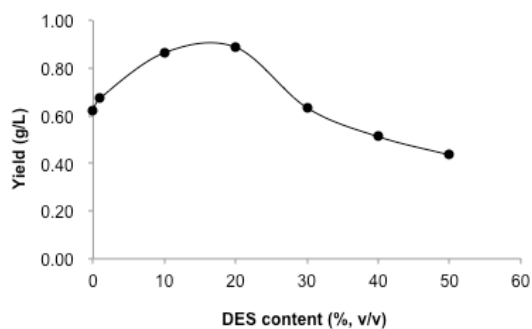

Figure S2. Correlation between the conversion yield and the solubility of isoeugenol in DES-containing system. The yields and solubilities were obtained in aqueous solution containing 1% (v/v) and 20% (v/v) DES, respectively.

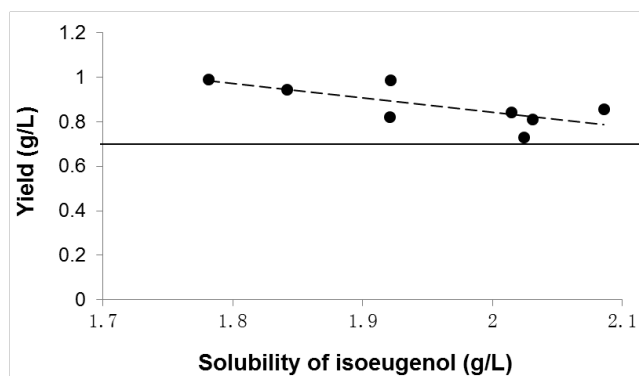

Figure S3. A sigmoid relationship (b) between the concentration of ChAc/G (1:1) in the solution for treating the cells and the proportion of the dead cells, as determined by FCM (a).

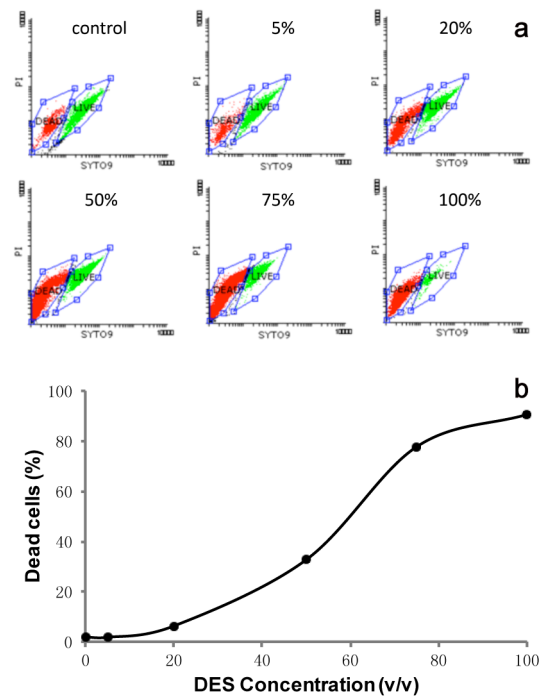

Figure S4. The change in OD260 (top) and OD280 (bottom) along with time of treatment with 20% (v/v) DES for the cells.

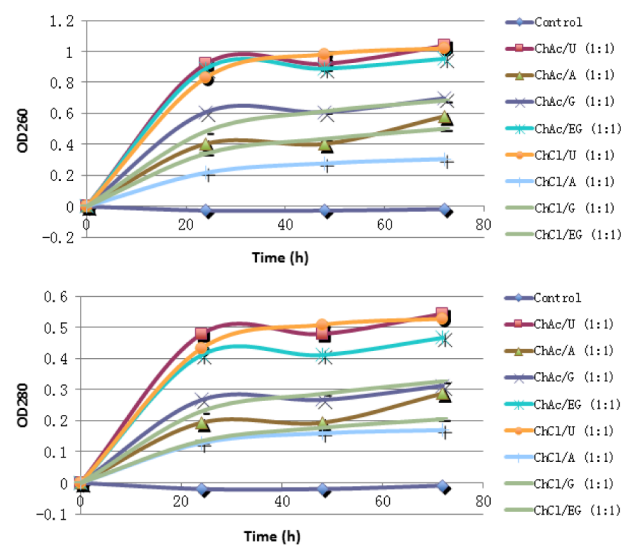

Figure S5. Absorbance at 260 nm and 280 nm determined spectrophotometrically after the cells were treated for 24 h in aqueous solution containing 20% (v/v) DES.

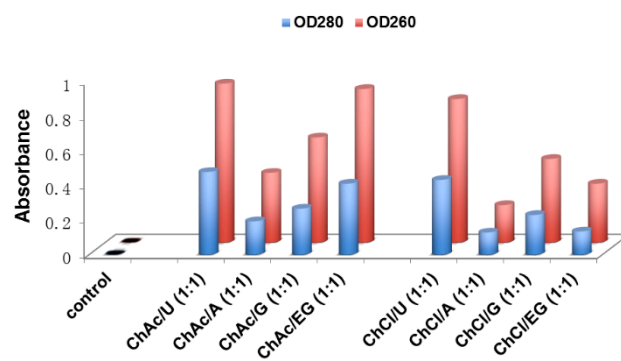

Supplement: Supplementary file 1 [file 8654641]
